# Supplementary material for: Implementing research results in clinical practice- the experiences of healthcare professionals
Source: Springer Nature journal article supplement (doi:10.1186/s12913-016-1292-y), 2015-12-01
Supplement: MOESM1 [file 9758162]

## Interview guide (translated from Danish)

| Themes and theoretical framework                                                                                                                                                              | Operationalization                                                                                                                                                                                                        | Questions                                                                                                                                                                                                                                                                                                                                                                                                                                  |
|-----------------------------------------------------------------------------------------------------------------------------------------------------------------------------------------------|---------------------------------------------------------------------------------------------------------------------------------------------------------------------------------------------------------------------------|--------------------------------------------------------------------------------------------------------------------------------------------------------------------------------------------------------------------------------------------------------------------------------------------------------------------------------------------------------------------------------------------------------------------------------------------|
| Opening questions                                                                                                                                                                             |                                                                                                                                                                                                                           | <ul style="list-style-type: none"> <li>- What is your experience implementing research results in to everyday practice at the ward?</li> <li>- Please describe how you have been involved in this.</li> <li>- Have you ever been involved in implementation of research results? With a team? What was your role?</li> </ul>                                                                                                               |
| A package of implementation policies and practices established by an organization                                                                                                             | <p>Quality and quantity of necessary training in order to teach the staff to use the new evidence based initiative in practice.</p> <p>Incentives to apply the initiative in practice – i.e. recognition and rewards.</p> | <ul style="list-style-type: none"> <li>- When you (or someone else) have decided to introduce new research results to your practice, what was your experience? What was done? Who did what?</li> <li>- Is it your experience that someone is following the change in practice? And how is that done?</li> <li>- Who is interested in whether things are actually being changed?</li> </ul>                                                 |
| The climate for innovation implementation in the team or organization — i.e. the employees' shared perceptions of the importance of innovation implementation within the team or organization | <p>Common understanding of the importance of the evidence based initiative in the team/organization.</p> <p>Motivation – possibly through involvement.</p>                                                                | <ul style="list-style-type: none"> <li>- What is your opinion regarding changing your practice or the practice which you are part of when you come across new research results?</li> <li>- Does it make sense to you when new results are to be implemented? How does it make sense?</li> <li>- How do you experience the atmosphere when you are doing things in a different way than the usual based on new research results?</li> </ul> |
| Managerial support for innovation implementation                                                                                                                                              | The management's support for the implementation and the communication about evidence based initiatives is convincing, well informed                                                                                       | <ul style="list-style-type: none"> <li>- Who typically informs you when an upcoming new initiative (based on research results) is to be implemented at the ward?</li> <li>- What is your experience of how the management articulate new initiatives based on research results?</li> <li>- Who typically articulates the vision/intention of the new practice?</li> </ul>                                                                  |

|                                                                                                                                                                 |                                                                                                                                                                                                                                                                                                                                                                                                                       |                                                                                                                                                                                                                                                                                                                                                                                               |
|-----------------------------------------------------------------------------------------------------------------------------------------------------------------|-----------------------------------------------------------------------------------------------------------------------------------------------------------------------------------------------------------------------------------------------------------------------------------------------------------------------------------------------------------------------------------------------------------------------|-----------------------------------------------------------------------------------------------------------------------------------------------------------------------------------------------------------------------------------------------------------------------------------------------------------------------------------------------------------------------------------------------|
|                                                                                                                                                                 |                                                                                                                                                                                                                                                                                                                                                                                                                       | <ul style="list-style-type: none"> <li>- If you are a manager yourself, how do you articulate the implementation of research results in your practice?</li> </ul>                                                                                                                                                                                                                             |
| The availability of financial resources                                                                                                                         | <p>Change of the requirements for personal resources.<br/>         Payment for training.<br/>         Time for learning in practice.<br/>         Adjustment of production demands while implementing the new initiative.</p>                                                                                                                                                                                         | <ul style="list-style-type: none"> <li>- Have you experienced an allocation of extra resources when the research based change of practice is taking place? (For example an increase in financial resources, competency development, extra hands).</li> </ul>                                                                                                                                  |
| A learning orientation: a set of interrelated practices and beliefs that support and enable employee and organizational skill development, learning, and growth | <p>The employees' willingness to take risks and opportunity to experiment with the research based initiative.<br/>         The absence of a 'zero error culture'.<br/>         Change management with the emphasis on the vision of the initiative.<br/>         Own fallibility and the requirement of the employees' efforts in the implementation.<br/>         Acknowledgement of the employees' competences.</p> | <ul style="list-style-type: none"> <li>- When you implement new research results, how do you learn? Try to be very specific.</li> </ul>                                                                                                                                                                                                                                                       |
| Managerial patience, i.e. long-term orientation                                                                                                                 | <p>The management's patience and persistence in relation to the initiative.<br/>         Eye on long term outcomes as a supplement to the short term costs of the implementation.</p>                                                                                                                                                                                                                                 | <ul style="list-style-type: none"> <li>- Have you experienced that research based initiatives have been left or maybe have faded out after a while? What happened?</li> <li>- Do you experience that the management follows up on the new initiatives based on research results?</li> <li>- If you are a manager, how do you follow the new initiatives based on research results?</li> </ul> |
